# Supplementary material
Source: MDPI journal article supplement (https://www.mdpi.com/2227-7390/11/6/1502)
Supplement: s1 [file s1]

Archive with 3 entries (3 files):
- Supplementary material File S1.pdf
- Supplementary material File S2 Code test.pdf
- Supplementary material File S3 R and SAS Code.pdf
